# Supplementary material for: A Proteomic Approach Identified TFEB as a Key Player in the Protective Action of Novel CB2R Bitopic Ligand FD22a against the Deleterious Effects Induced by β-Amyloid in Glial Cells
Source: MDPI journal article supplement (doi:10.3390/cells13100875), 2024-05-19
Supplement: s1 [file s1]

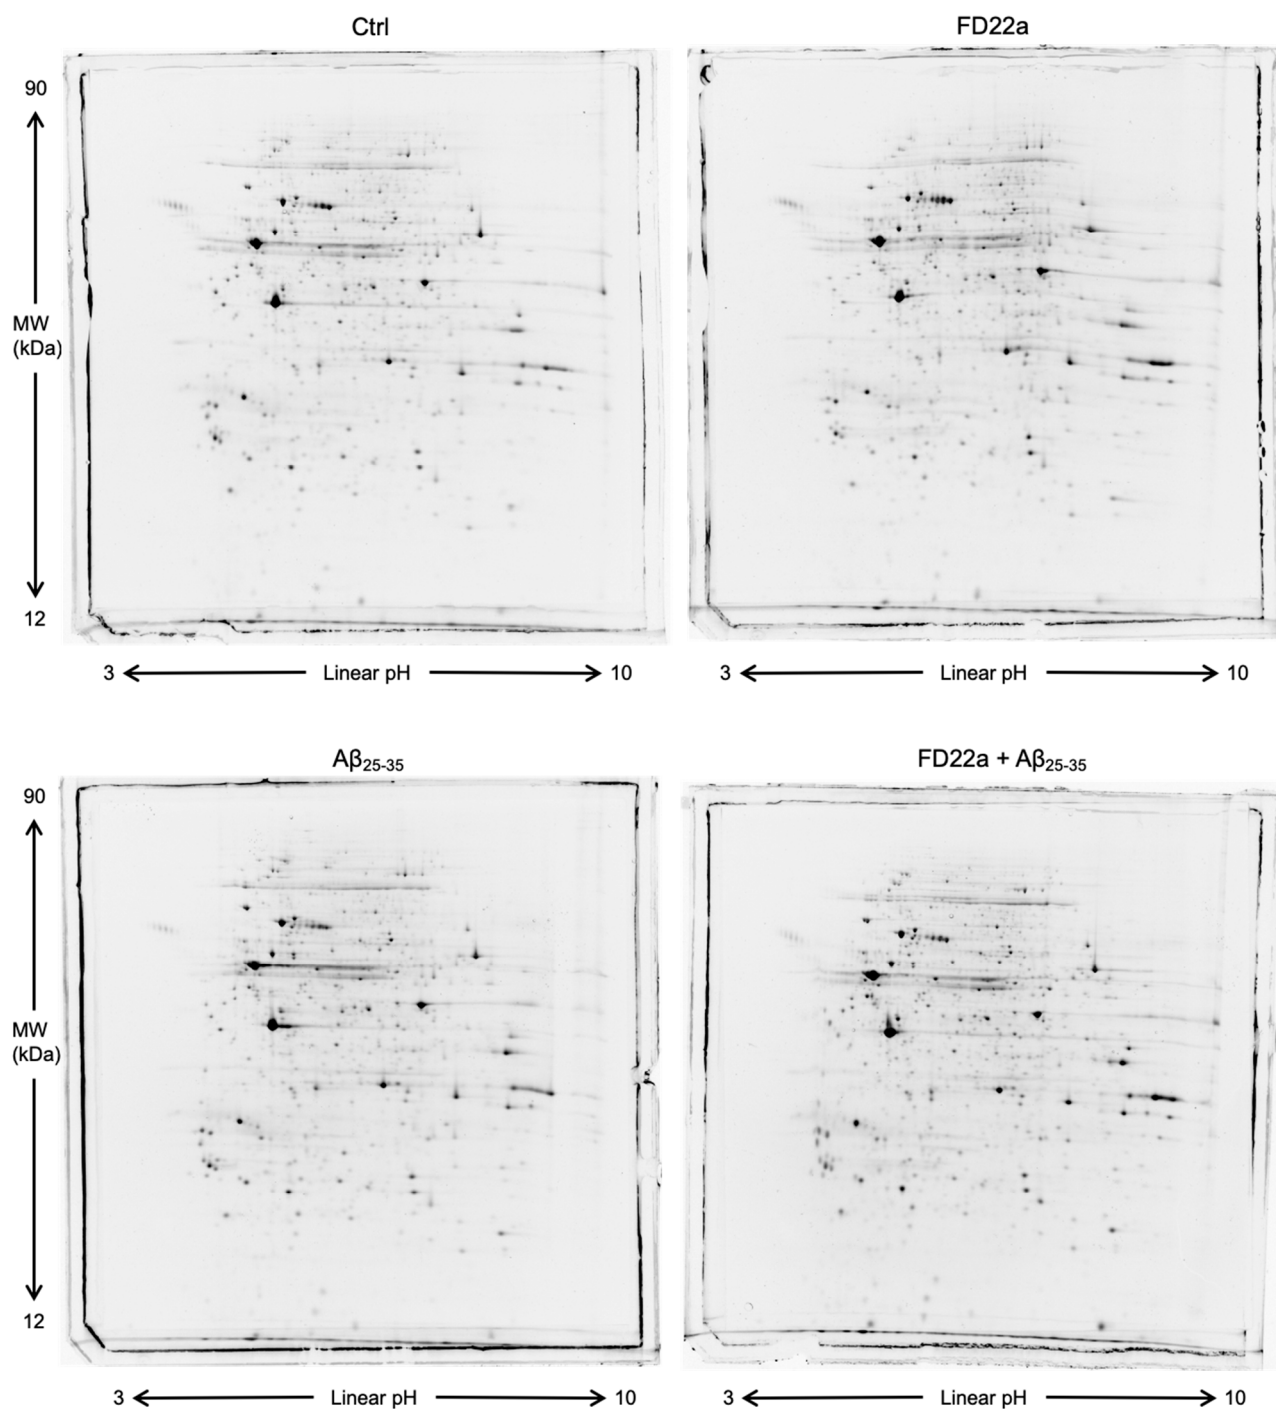

**Figure S1.** Representative 2DE image of U87-MG proteome in different condition of treatment. Protein extracts were separated in a linear pH 3–10 gradient. SDS-PAGE was performed using 12% acrylamide. Gels were stained with fluorescent dye and acquired by Image Quant L.
